# Supplementary material for: Real-time imaging of photosynthetic oxygen evolution from spinach using LSI-based biosensor
Source: PubMed Central journal article supplement (PMC6706413; doi:10.1038/s41598-019-48561-y), 2019-08-22
Supplement: 41598_2019_48561_MOESM1_ESM.pdf [file 41598_2019_48561_MOESM1_ESM.pdf]

# Real-time imaging of photosynthetic oxygen evolution from spinach using LSI-based biosensor

Shigenobu Kasai<sup>1,2\*</sup>, Yamato Sugiura<sup>1</sup>, Ankush Prasad<sup>3#</sup>, Kumi Y Inoue<sup>4</sup>, Teruya Sato<sup>1</sup>, Tomohiro Honmo<sup>1</sup>, Aditya Kumar<sup>3</sup>, Pavel Pospíšil<sup>3</sup>, Kosuke Ino<sup>5</sup>, Yuka Hashi<sup>4</sup>, Yoko Furubayashi<sup>4</sup>, Masahki Matsudaira<sup>4</sup>, Atsushi Suda<sup>6</sup>, Ryota Kunikata<sup>6</sup> and Tomokazu Matsue<sup>4,5</sup>

<sup>1</sup>Graduate Department of Environmental Information Engineering, Tohoku Institute of Technology, Sendai, Japan

<sup>2</sup>Biomedical Engineering Research Center, Tohoku Institute of Technology, Sendai, Japan

<sup>3</sup>Department of Biophysics, Centre of the Region Haná for Biotechnological and Agricultural Research, Faculty of Science, Palacký University, Olomouc, Czech Republic

<sup>4</sup>Graduate School of Environmental Studies, Tohoku University, Sendai, Japan

<sup>5</sup> Graduate School of Engineering, Tohoku University, Aoba-ku, Sendai, Japan

<sup>6</sup>Japan Aviation Electronics Industry, Limited, Tokyo, Japan

## **\*Corresponding author:**

S. Kasai, Graduate Department of Environmental Information Engineering, Tohoku Institute of Technology, Sendai, Japan.

Tel.: +81-22-305-3970; Fax: +81-22-305-3970

*E-mail address:* [kasai@tohtech.ac.jp](mailto:kasai@tohtech.ac.jp)

## **#Co-Corresponding author:**

*E-mail address:* [prasad.ankush@gmail.com](mailto:prasad.ankush@gmail.com)

## Supplementary Fig S1

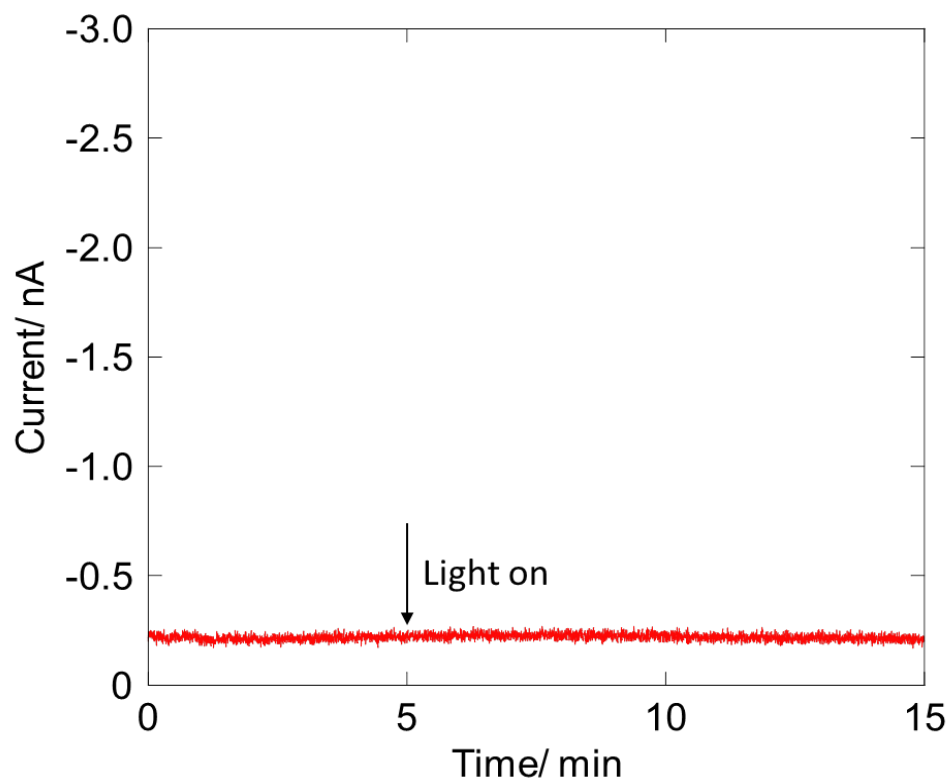

**Figure S1:** Real-time monitoring of oxygen reduction current in system containing spinach leaf in the presence of DCMU (5mM). The spinach leaf was illuminated at 3klx.

## Supplementary Fig S2

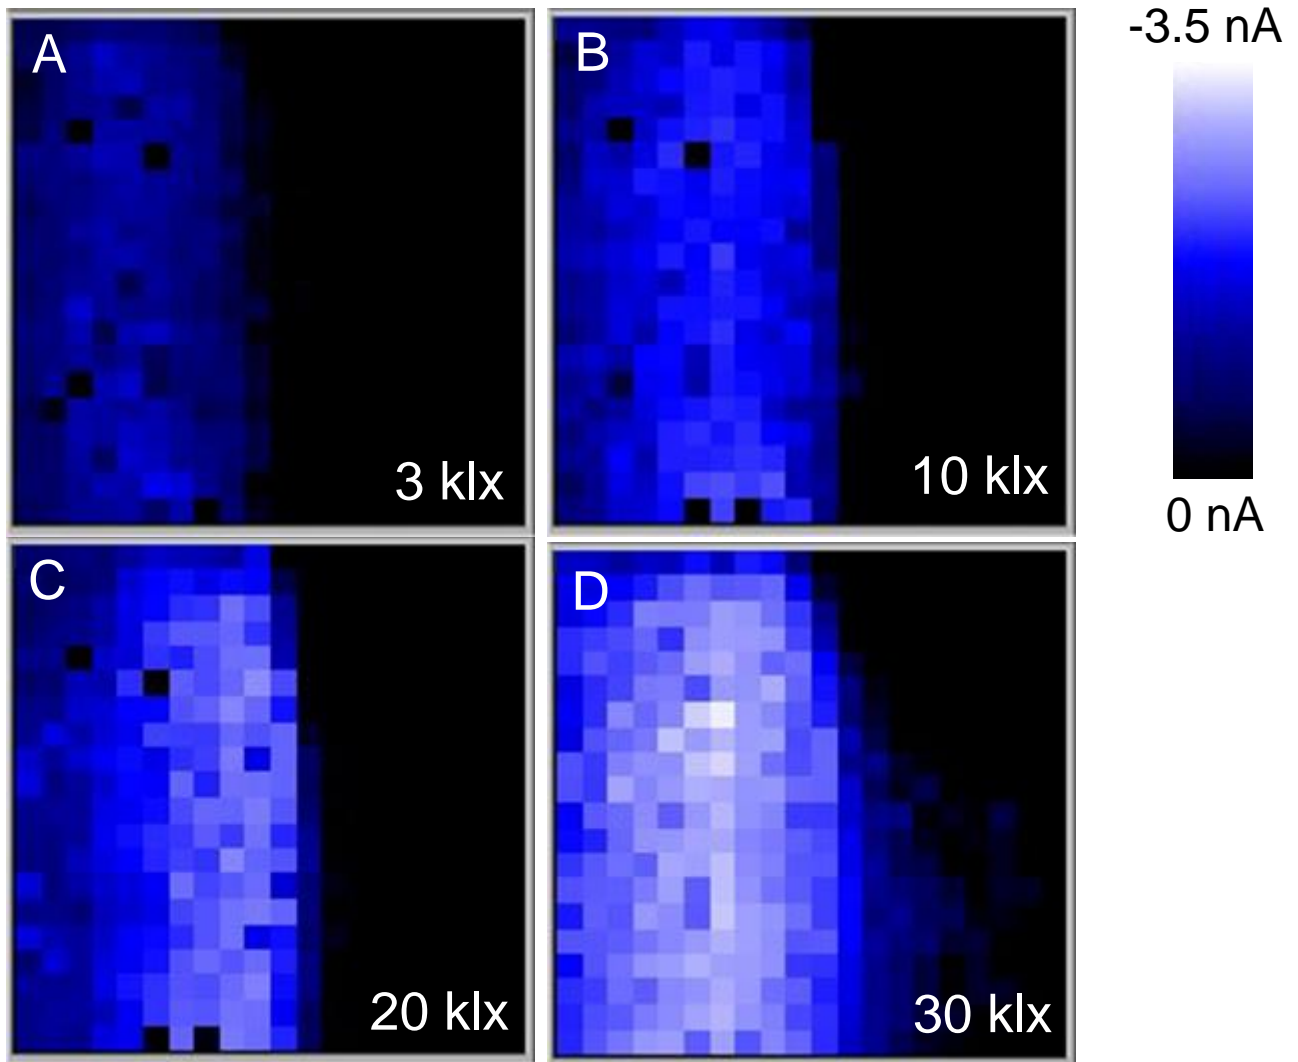

**Figure S2: Biological replicate on O<sub>2</sub> evolution at different light intensities.** Images of O<sub>2</sub> evolution after 5 min of light exposure from the spinach illuminated with 3klx (A), 10klx (B), 20klx (C) and 30klx (D).
